# Supplementary material for: Comparative genomic analysis of embryonic, lineage-converted, and stem cell-derived motor neurons
Source: Oxford University Press journal article supplement (doi:10.1242/dev.168617), 2018-01-01
Supplement: dev168617supp.pdf [file dev168617supp.pdf]

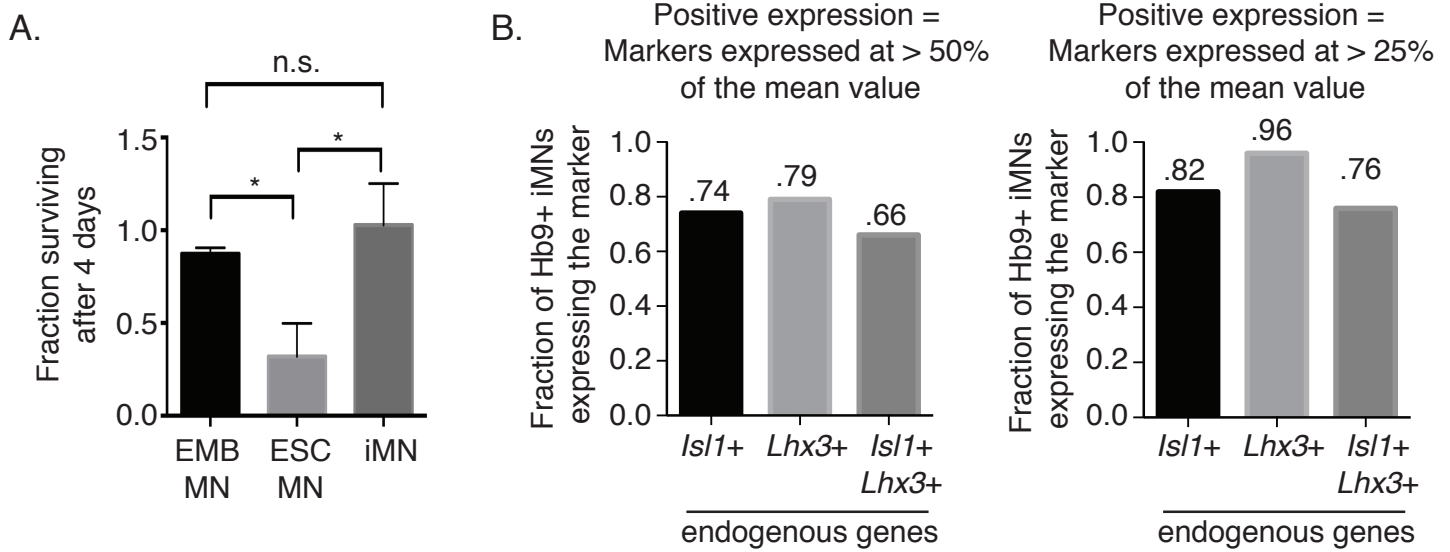

Figure S1. Comparison of motor neuron survival and subtype properties. A) Survival of primary and *in vitro*-derived motor neurons over a four-day period on a monolayer of primary cortical glia in medium with 10ng/ml GDNF, BDNF, and CNTF. Values were calculated from two (embryo MN and iMN) or four (ESC MN) biological replicates. Error bars denote standard deviation. Statistical significance was calculated using one-way ANOVA. \* -  $p < .05$ . B) Single cell qRT-PCR analysis of Hb9+ iMNs expressing endogenous *Is1*, *Lhx3*, or both *Is1* and *Lhx3*. A total of 62 Hb9+ iMNs were analyzed from two independent lineage conversions. The graph show the fraction of iMNs expressing endogenous *Is1* or *Lhx3* if those genes were required to be expressed at a level no less than 50% (left graph) or 25% (right graph) of the mean value of that gene amongst the iMNs analyzed.

A.

| Sample       | Read Pairs | Sample    | Read Pairs |
|--------------|------------|-----------|------------|
| EMB_MN rep1  | 16339620   | IPSC rep1 | 14333103   |
| EMB_MN rep2  | 24687703   | IPSC rep2 | 30910218   |
| ESC_MN rep1  | 7885038    | MEF2 rep1 | 11670915   |
| ESC_MN rep2  | 11366424   | MEF2 rep2 | 21967205   |
| ESC rep1     | 13069853   | MEF1 rep1 | 9890309    |
| ESC rep2     | 8287515    | MEF1 rep2 | 16746981   |
| iMN rep1     | 19416554   | MEF3 rep1 | 21728914   |
| iMN rep2     | 10854935   | MEF3 rep2 | 8503474    |
| IPSC_MN rep1 | 10787937   | MEF4 rep1 | 9881073    |
| IPSC_MN rep2 | 23232916   | MEF4 rep2 | 22401592   |

B.

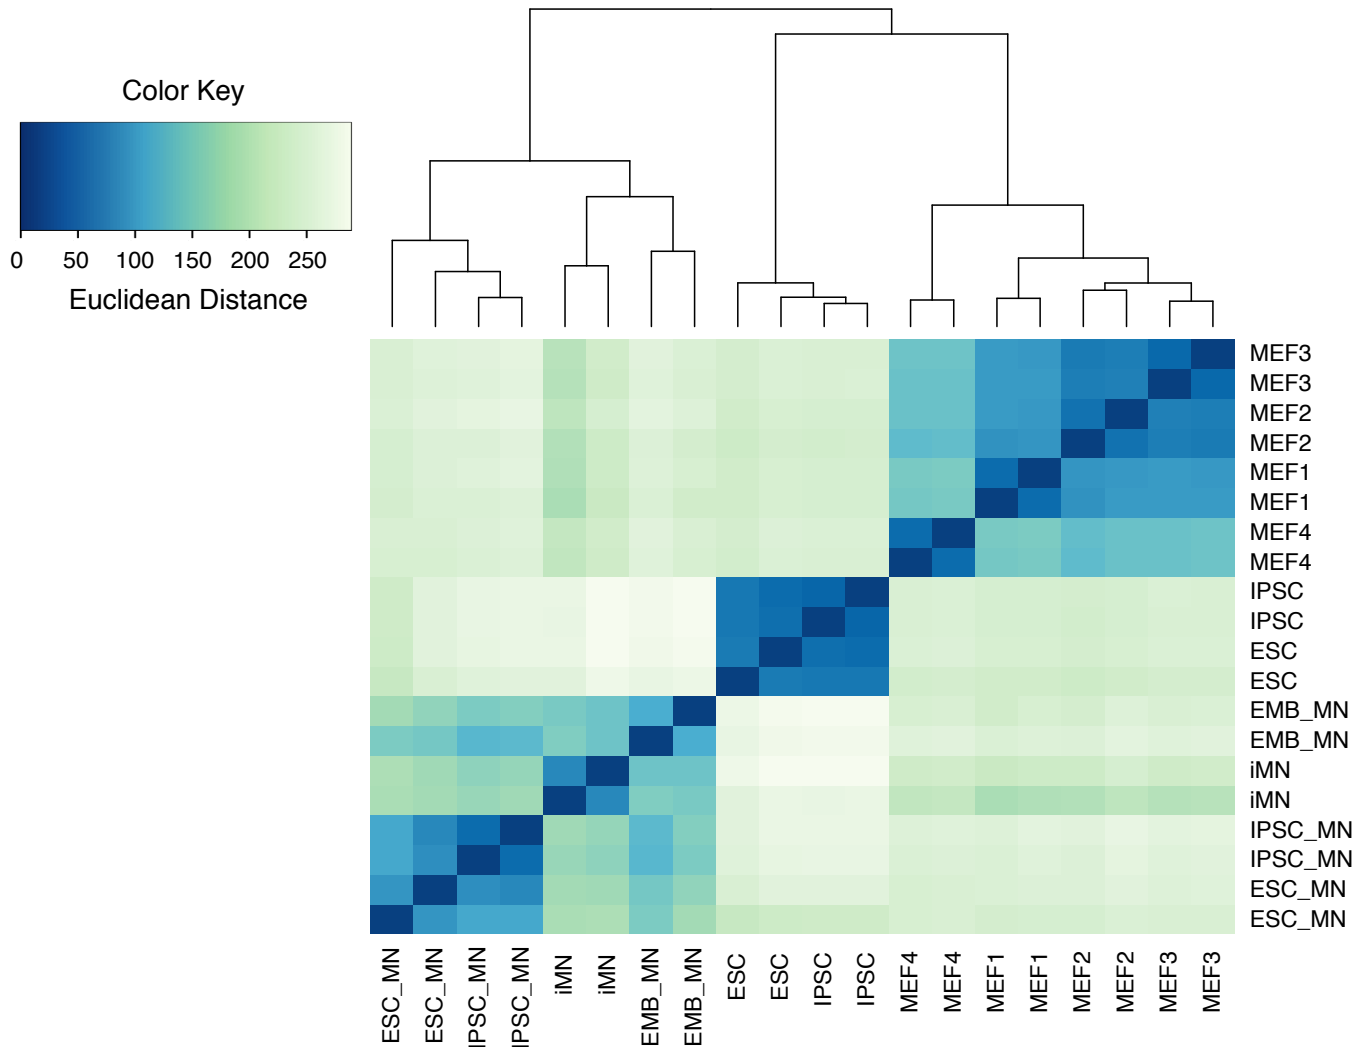

C.

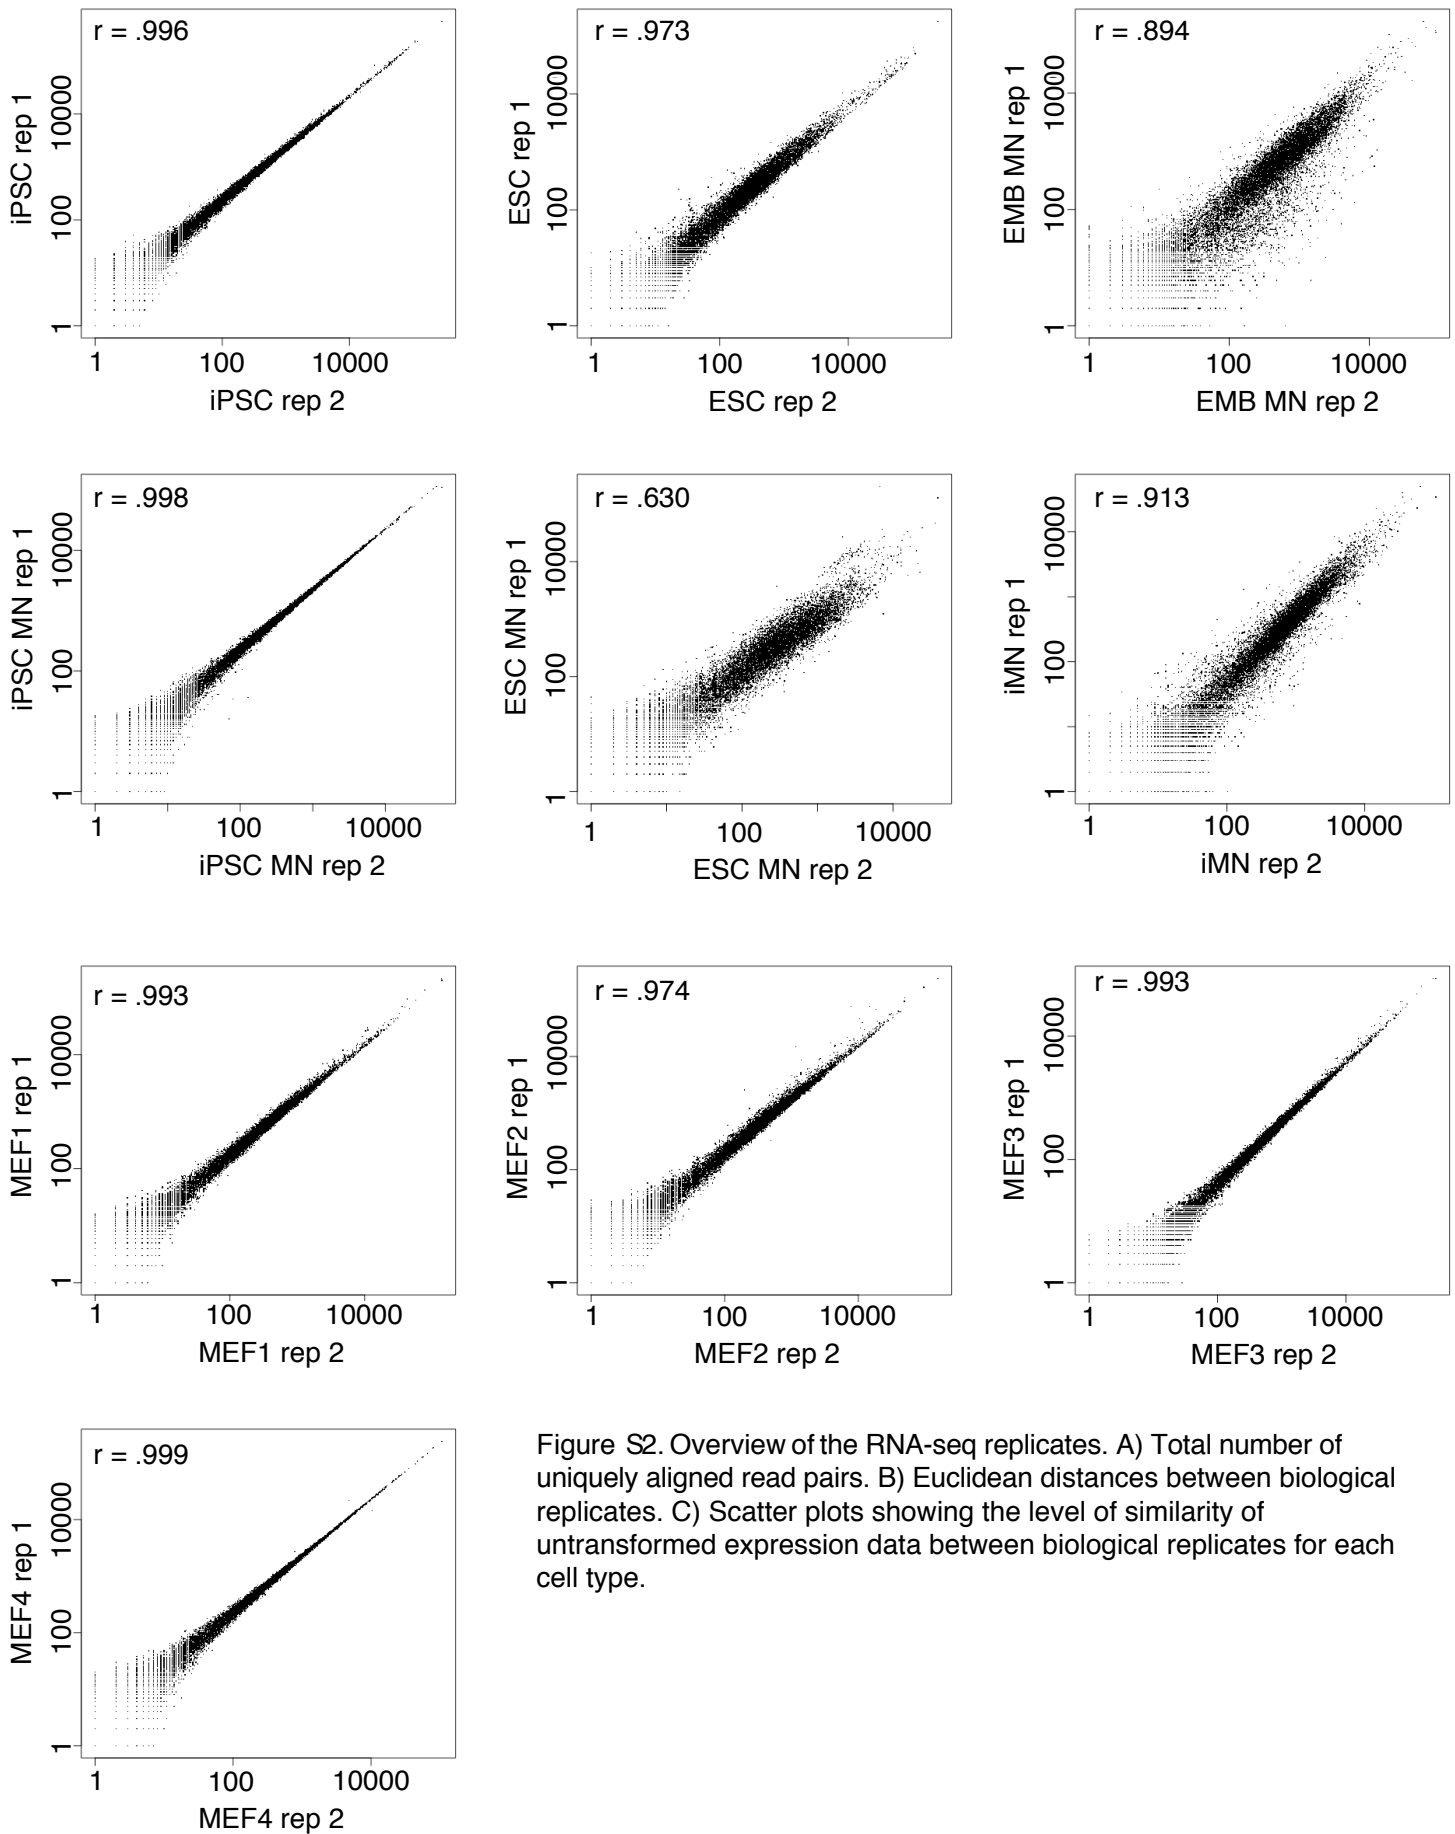

Figure S2. Overview of the RNA-seq replicates. A) Total number of uniquely aligned read pairs. B) Euclidean distances between biological replicates. C) Scatter plots showing the level of similarity of untransformed expression data between biological replicates for each cell type.

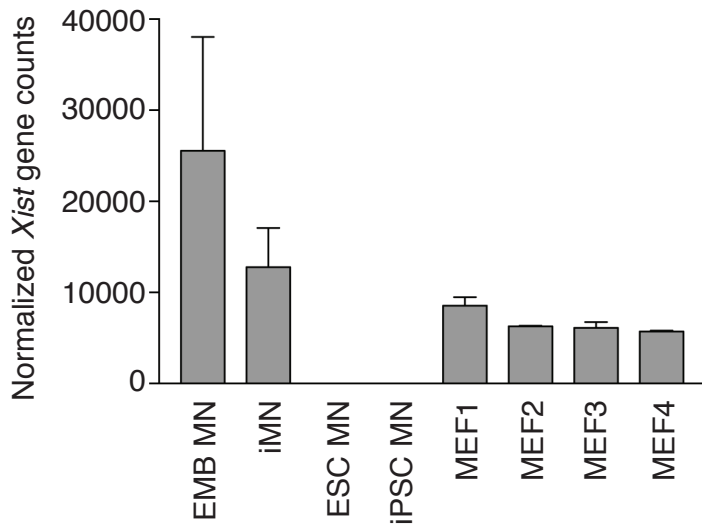

Figure S3. Transcription of *Xist* in motor neuron and MEF samples. Values are the normalized gene counts from DESeq2, and are obtained by the RNA sequencing of two biological replicates per cell type. Mean  $\pm$  standard deviation.

A.

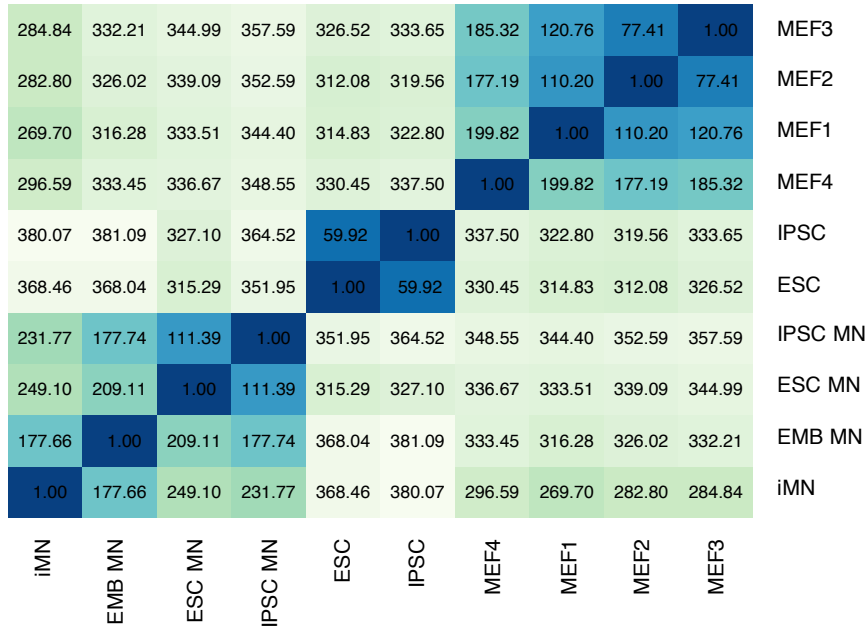

B.

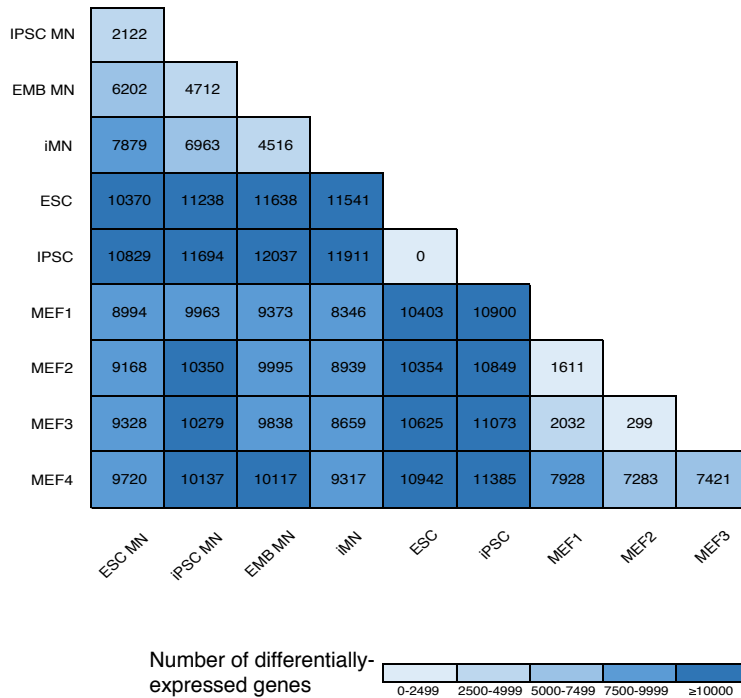

C.

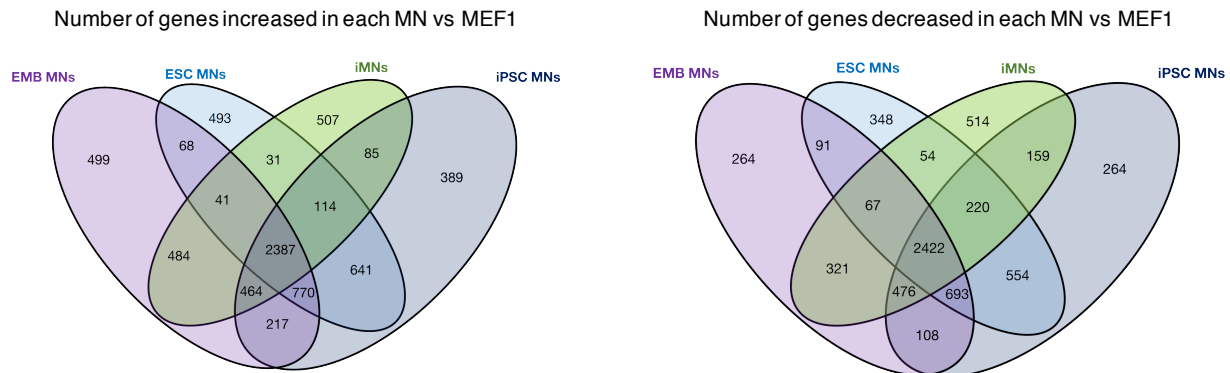

Figure S4. Global analysis of transcriptional data. A) Distance matrix between groups by the sum of squared shrunken log<sub>2</sub> fold changes. B) Total number of differentially expressed genes between each pairwise comparison. C). Overlap of genes significantly increased or decreased relative to MEF1 between motor neuron types. Two biological replicates were analyzed per sample type.

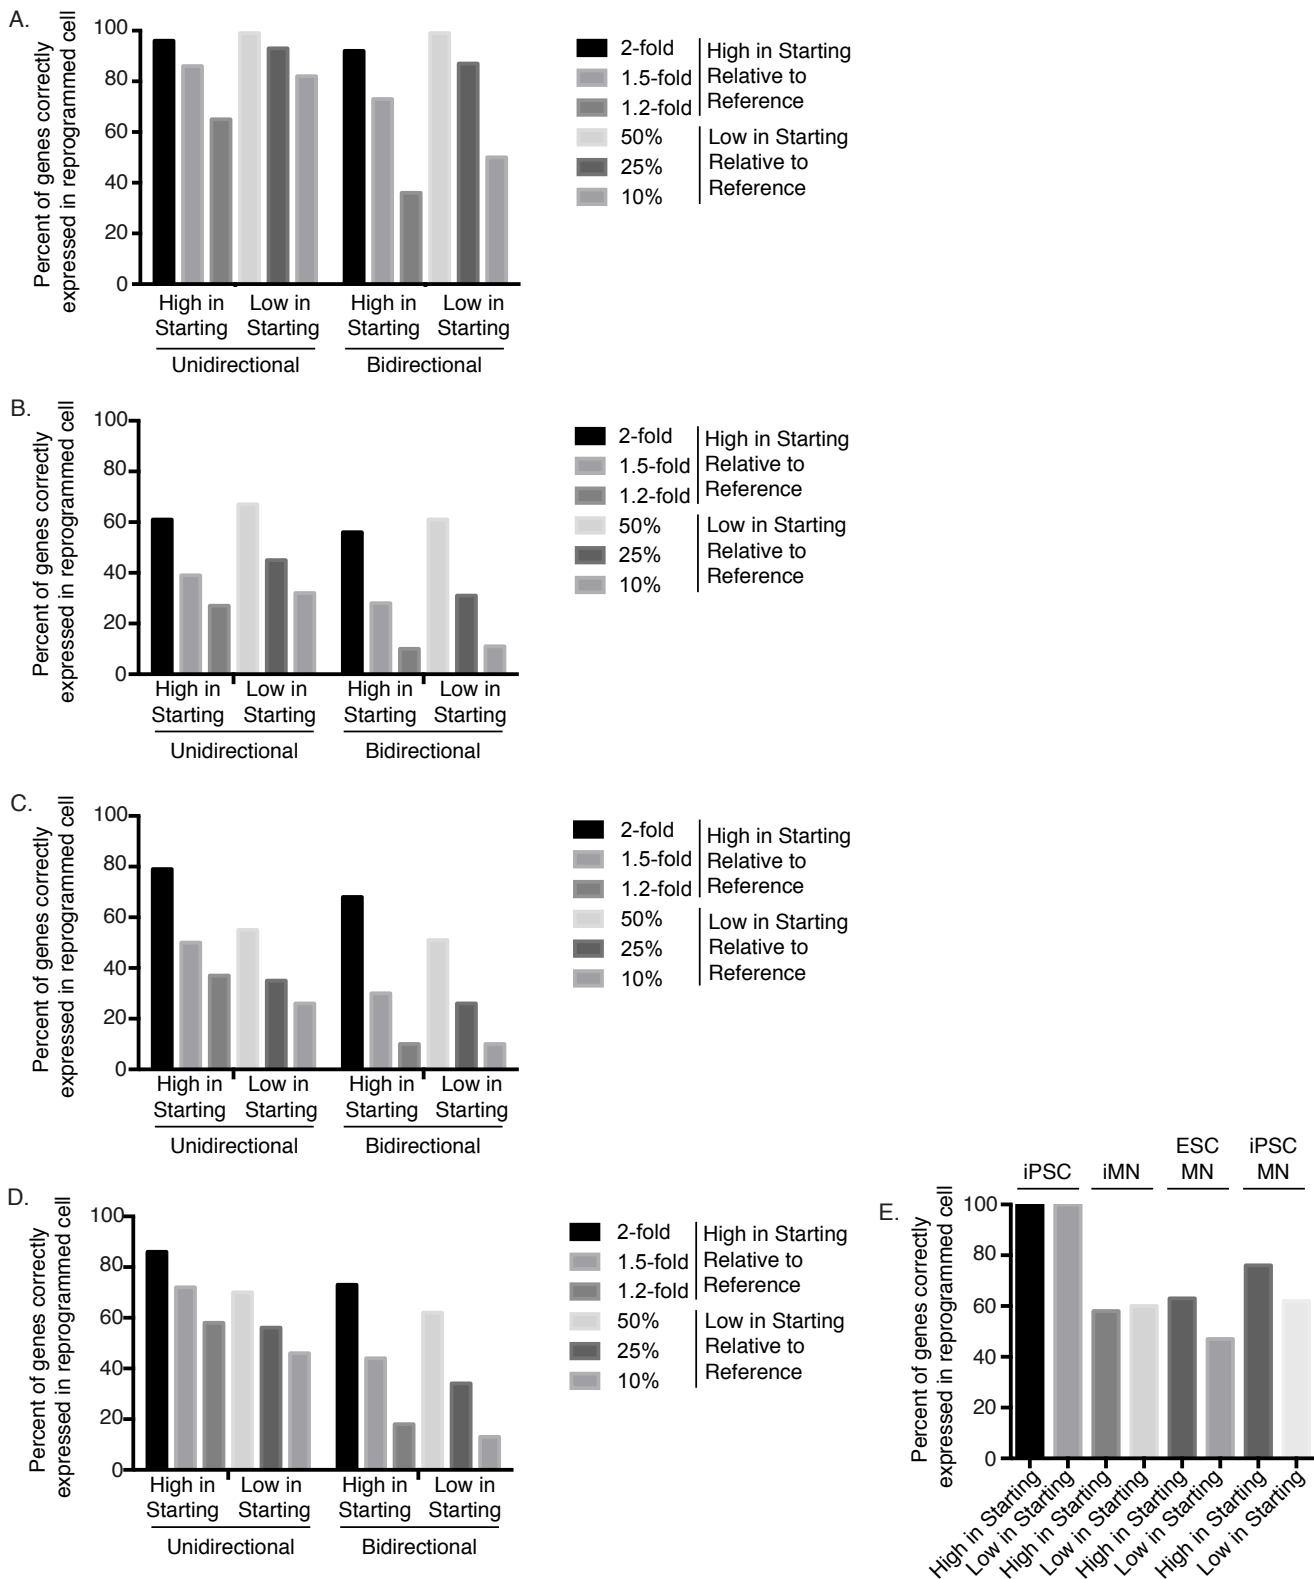

Figure S5. Percent of genes correctly expressed after lineage conversion or directed differentiation. The percent of genes that needed to be repressed or activated to become correctly expressed in (A) lineage conversion into iPSCs, (B) lineage conversion into iMNs, (C) directed differentiation into ESC MNs, or (D) directed differentiation into iPSC MNs. "High in Starting Relative to Reference" represents genes that were expressed higher in the starting cell than the reference cell and needed to be repressed during reprogramming. "Low in Starting Relative to Reference" represents genes that were expressed lower in the starting cell than the reference cell and needed to be increased during reprogramming. "Unidirectional" pertains to analyses in which genes were considered correctly expressed after lineage conversion or directed differentiation as long as they changed to a level greater than 50%, 25%, or 10% below the reference cell level for genes that needed to be increased, or to a level less than 2-, 1.5-, or 1.2-fold of the reference cell level for genes that needed to be repressed. "Bidirectional" pertains to the same analyses as "unidirectional" but in addition, genes that needed to be repressed could not be repressed to a level less than 50%, 25%, or 10% below the reference cell and genes that needed to be activated could not be over-activated to more than 2-, 1.5-, or 1.2-fold the reference cell level. (E) Percent of genes in iPSCs, iMNs, ESC MNs, and iPSC MNs that were differentially expressed between the starting and reference cells but are not differentially expressed between the test and reference cells according to DESeq2. Two biological replicates were analyzed per sample type.

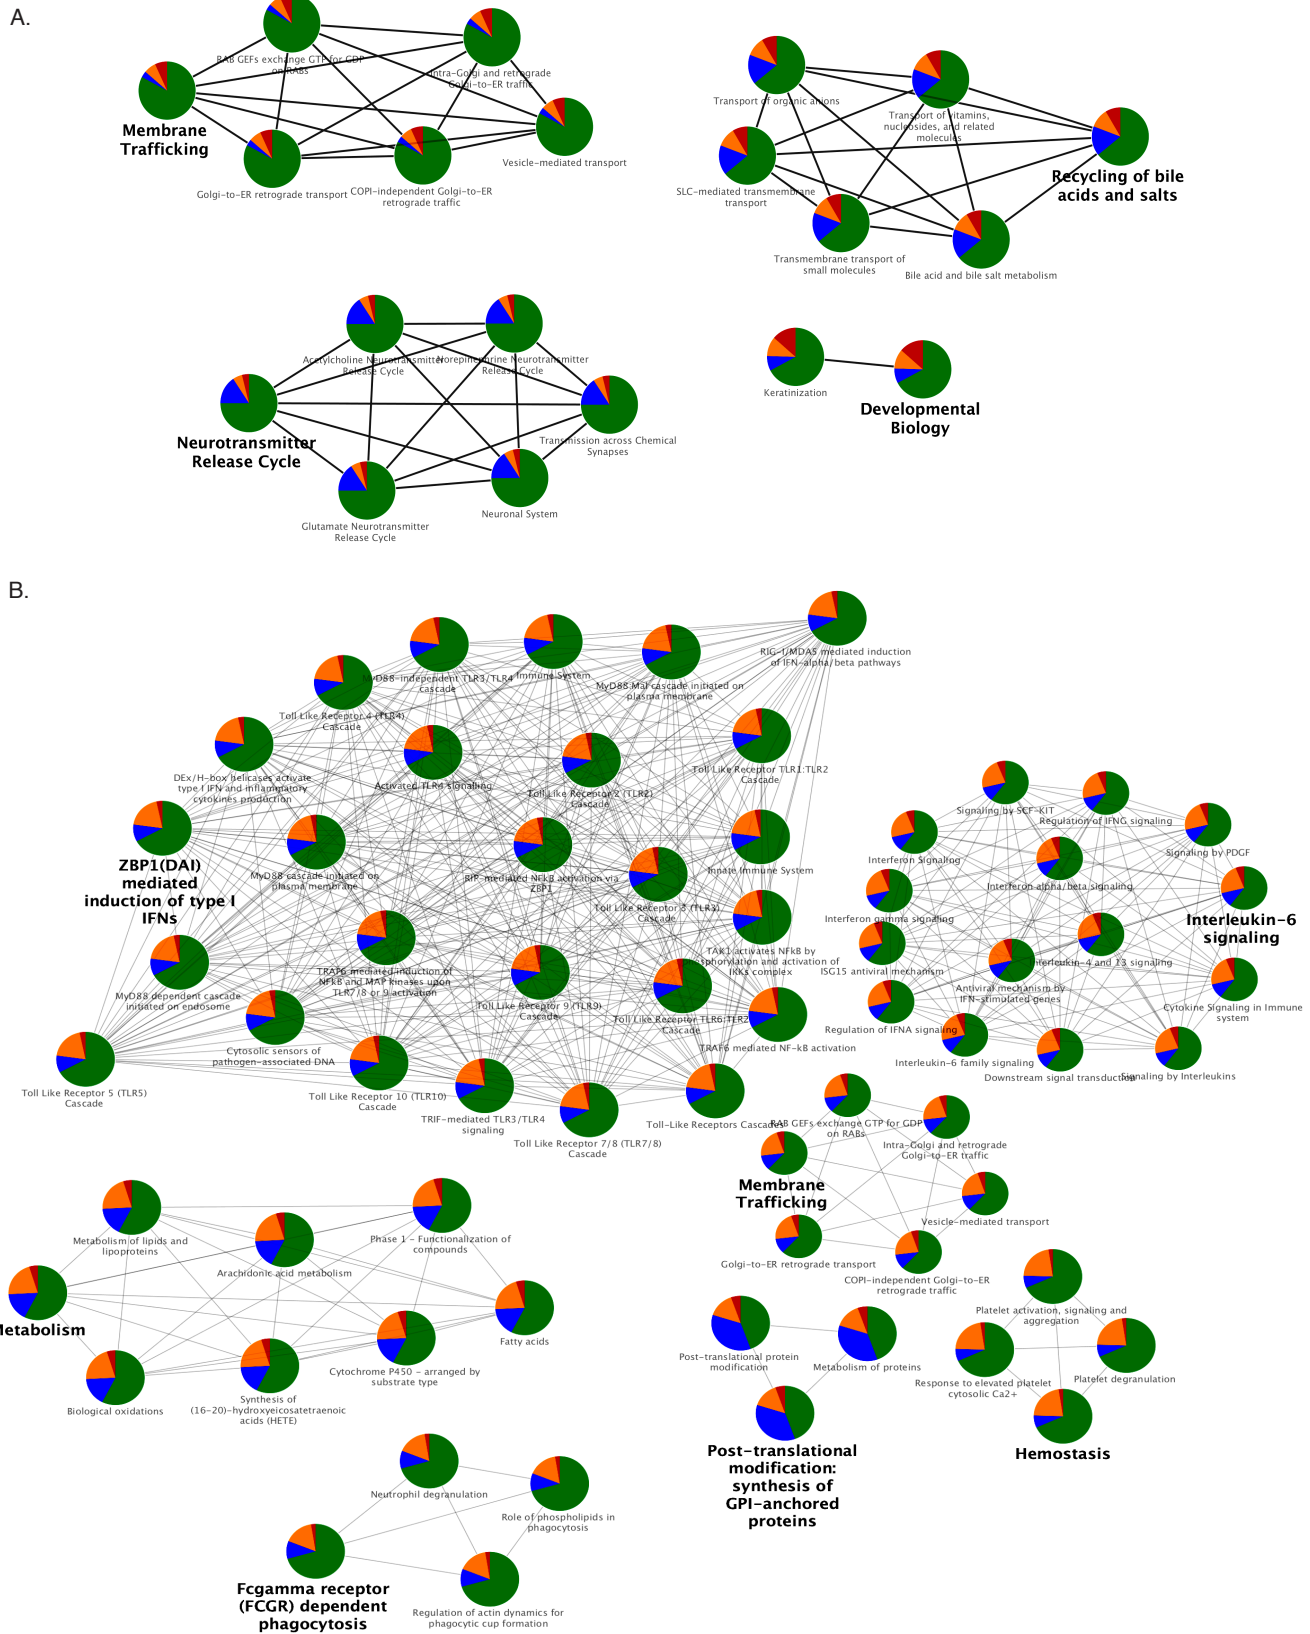

A.

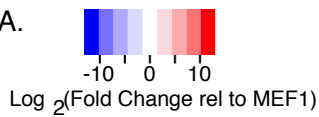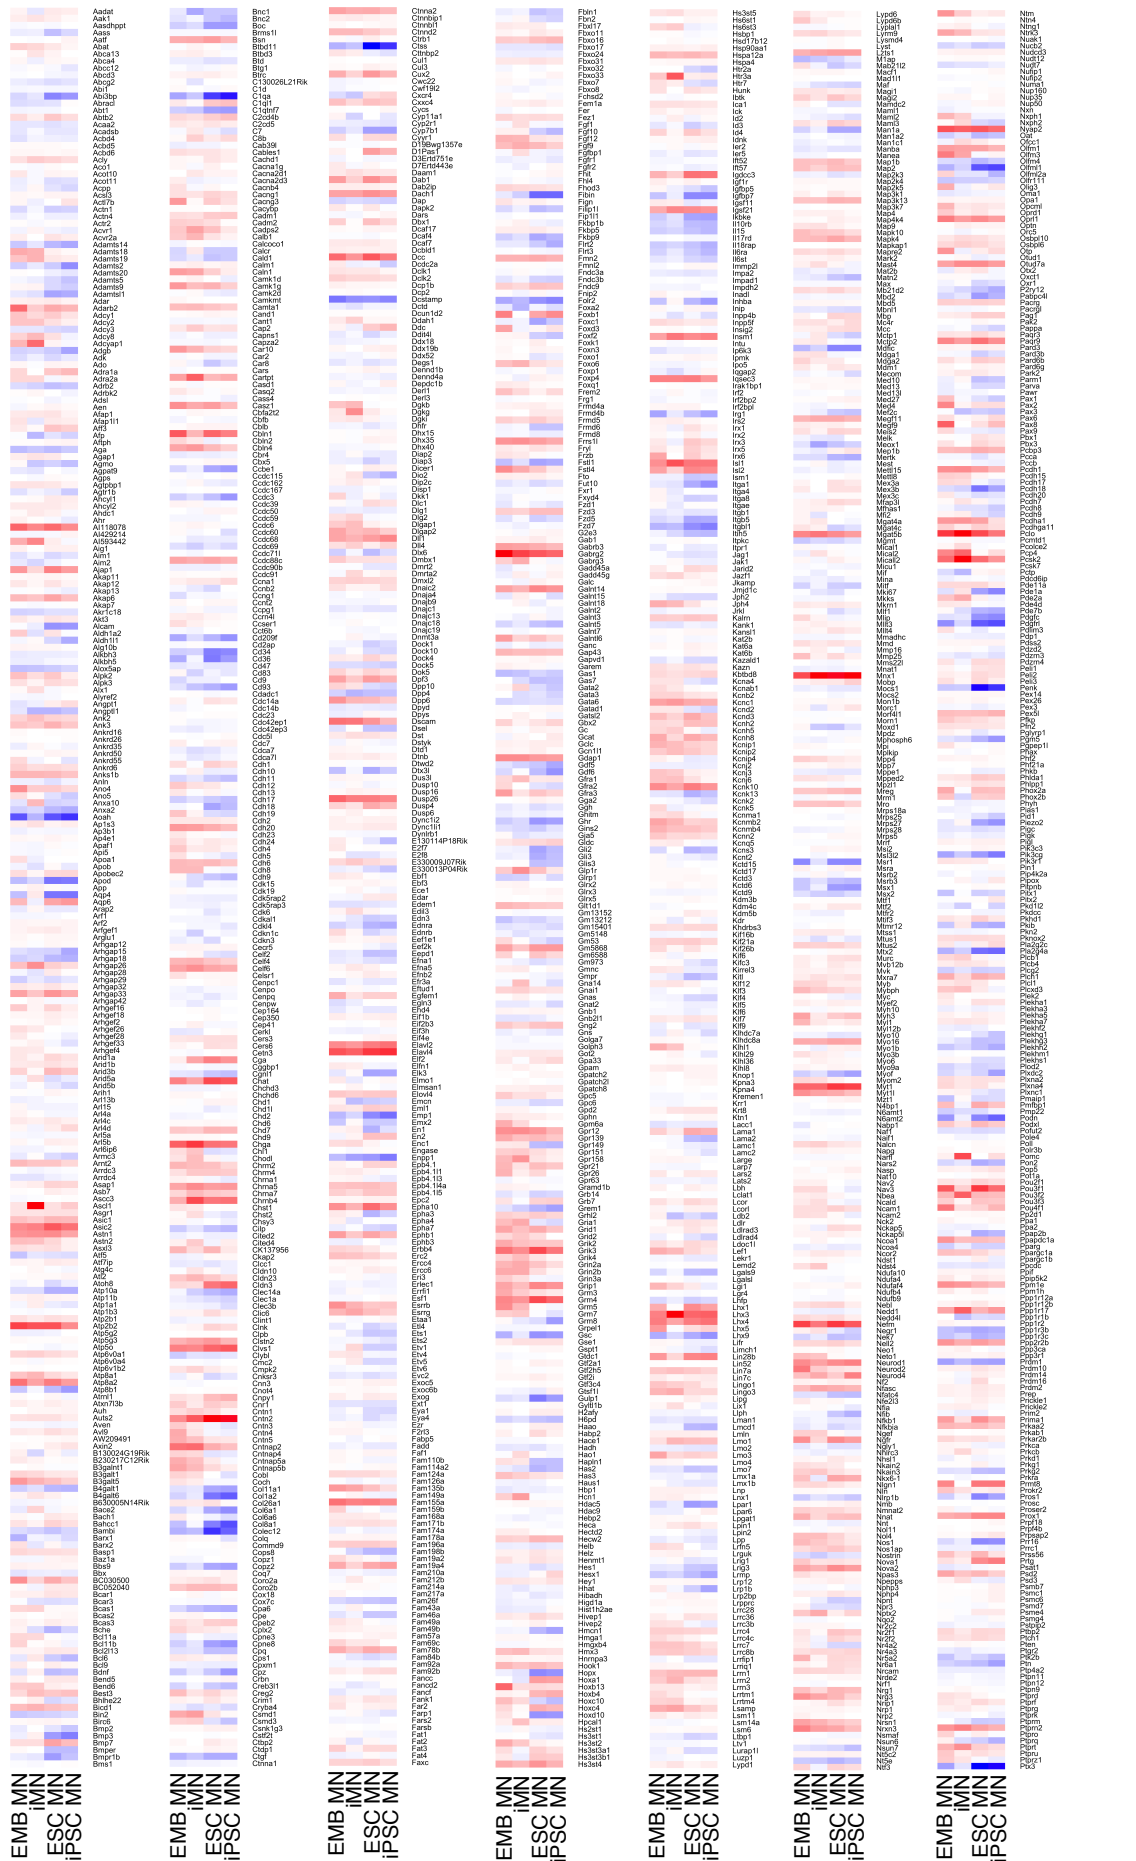



A.(continued)

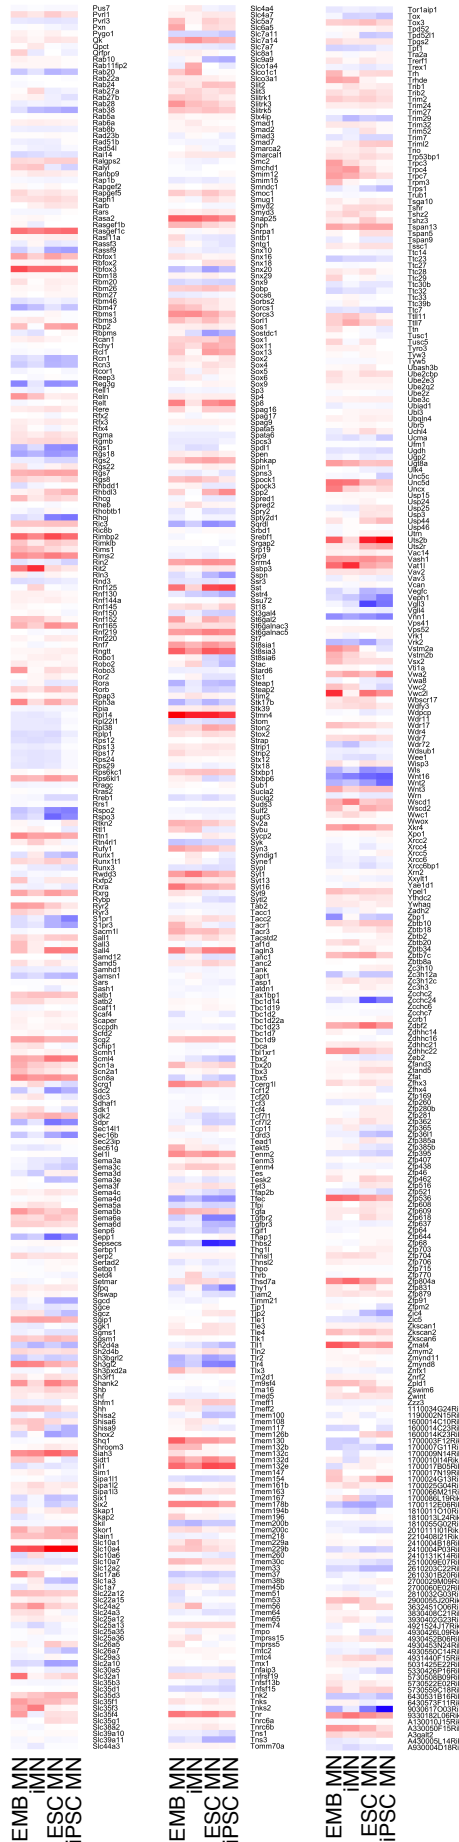

B.

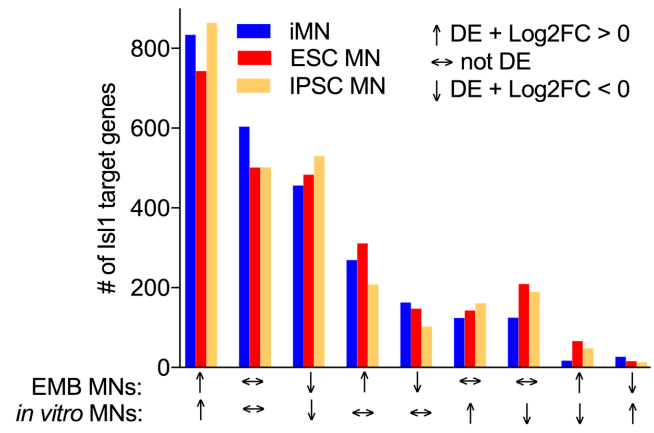

Figure S7. Transcriptomic analysis of Isl1 target genes in primary and *in vitro*-derived motor neurons. A) Gene expression analysis (derived from RNA-seq data) of known ISL1 target genes identified by Chip-Seq analysis (Mazzoni *et al.*, 2013). B) Number of Isl1 target genes differentially expressed in EMB MNs or *in vitro* MNs in comparison to MEF1 (DESeq2) and the directionality of the gene expression change relative to MEF1. DESeq2 was used to restrict the analyses to genes that could be reliably compared between samples. Two biological replicates were analyzed per cell type. DE = differentially expressed, FC = fold change.

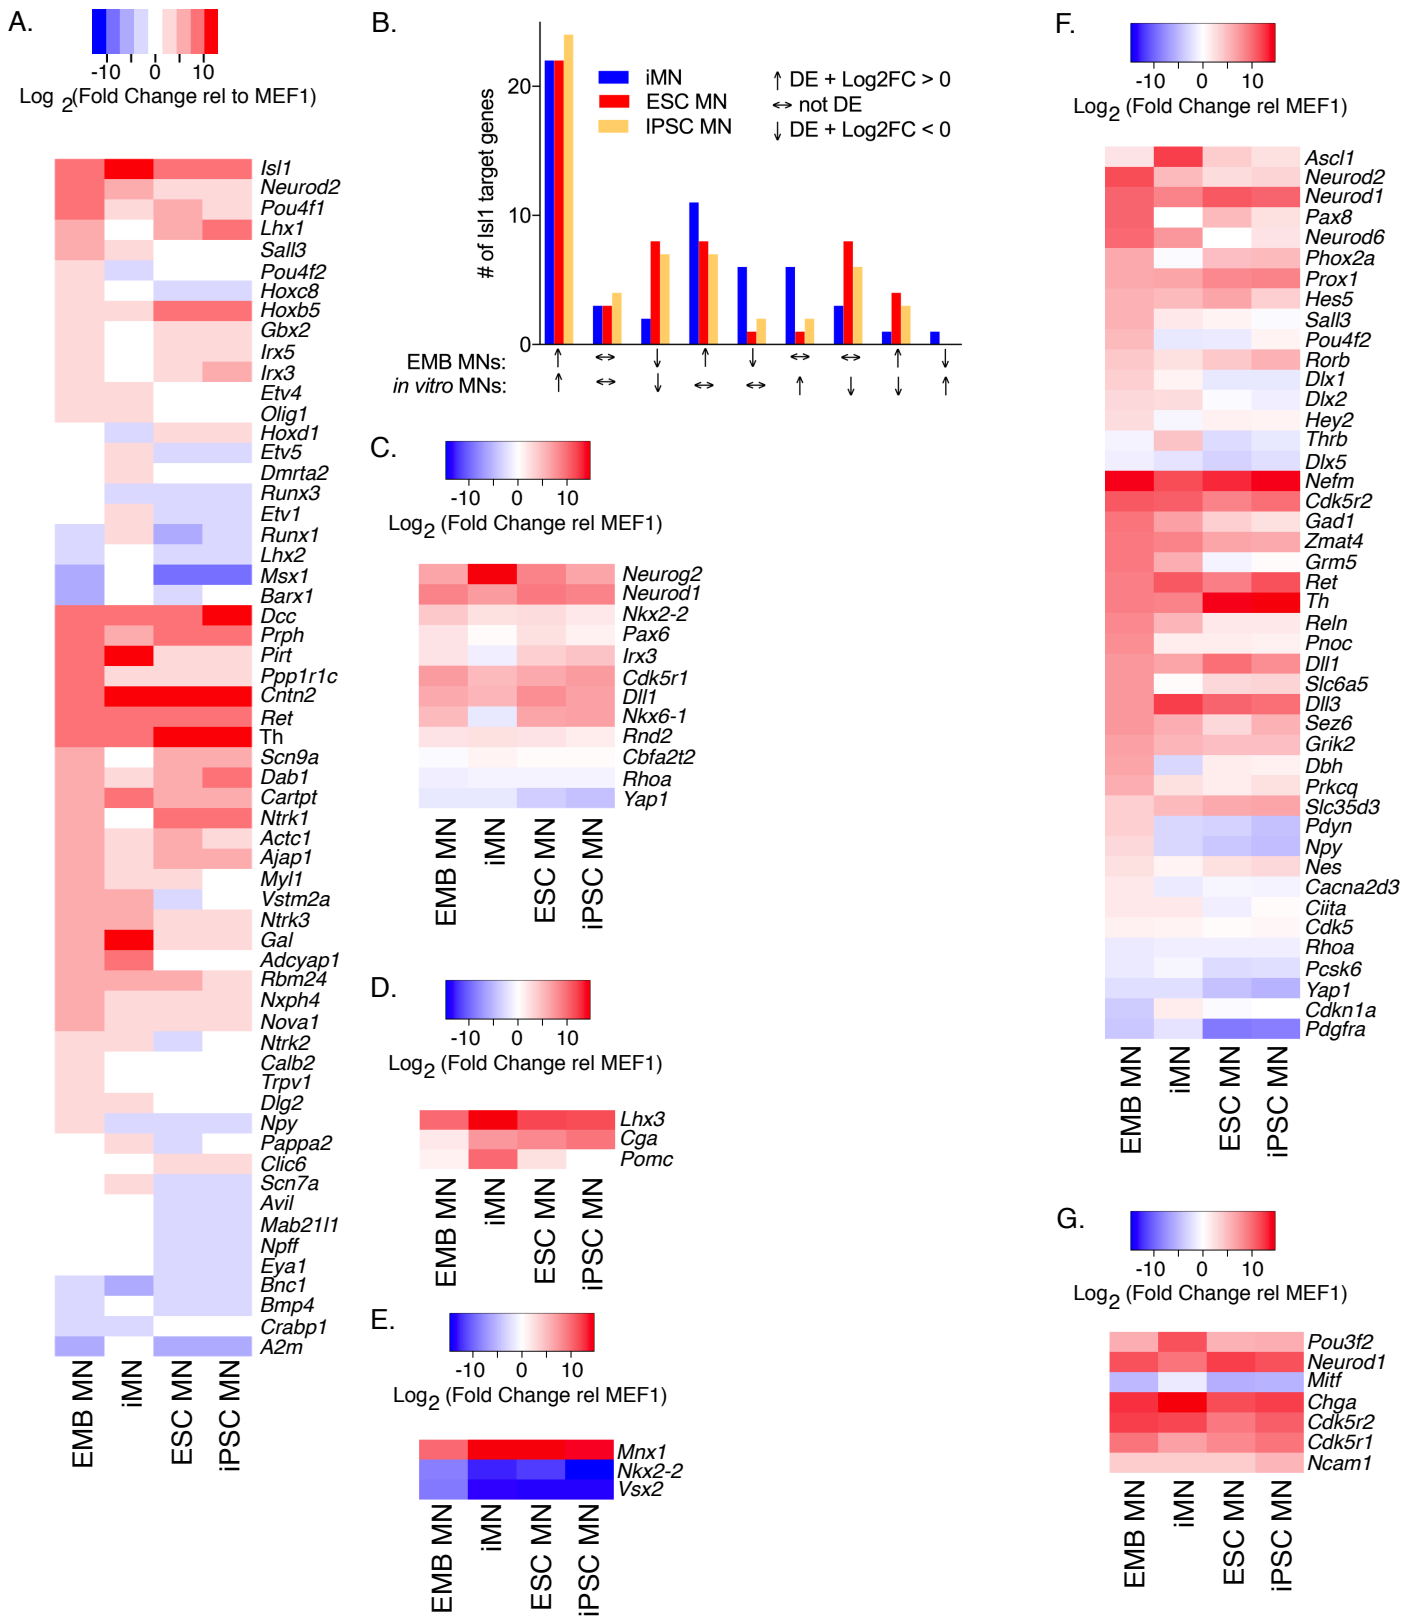

Figure S8. Transcriptomic analysis of iMN factor target genes identified using the Ingenuity Pathway Analysis network builder. (A, C-G) Gene expression analysis (from RNA-seq data) of (A) *Isl1*, (C) *Ngn2*, (D) *Lhx3*, (E) *Hb9*, (F) *Ascl1*, (G) *Brn2* target genes. (B) Number of *Isl1* target genes differentially expressed in the EMB MNs and *in vitro* MNs in comparison to MEF1 (DESeq2) and the directionality of the gene expression change relative to MEF1. DESeq2 was used to restrict the analyses to genes that could be reliably compared between samples. Two biological replicates were analyzed per cell type.

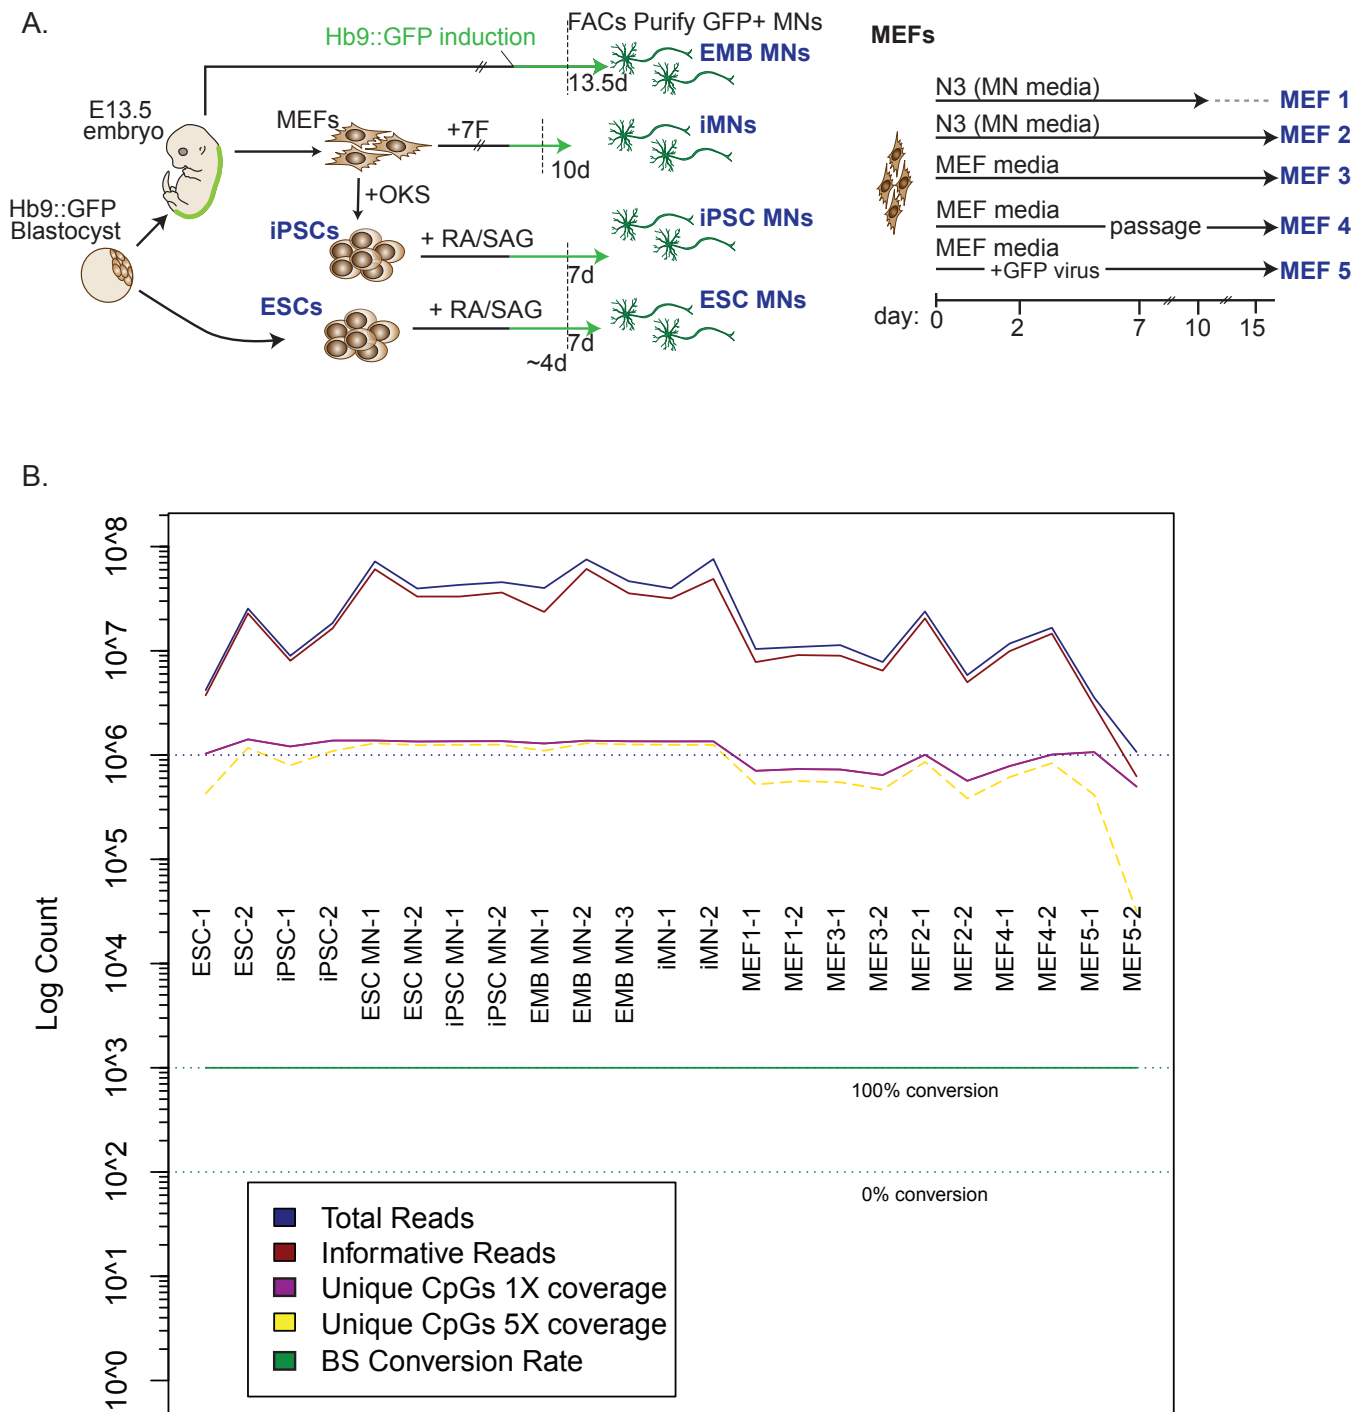

Figure S9. Overview of Methylation Analysis. A. Schematic of samples analyzed by reduced representation bisulfite sequencing (RRBS). B. Quality control metrics for all samples. At least 1M reads were obtained for each sample. Informative reads have at least 1 CpG covered within the sequencing read. 100% bisulfate (BS) conversion was achieved for all samples. Two biological replicates were analyzed per sample type.

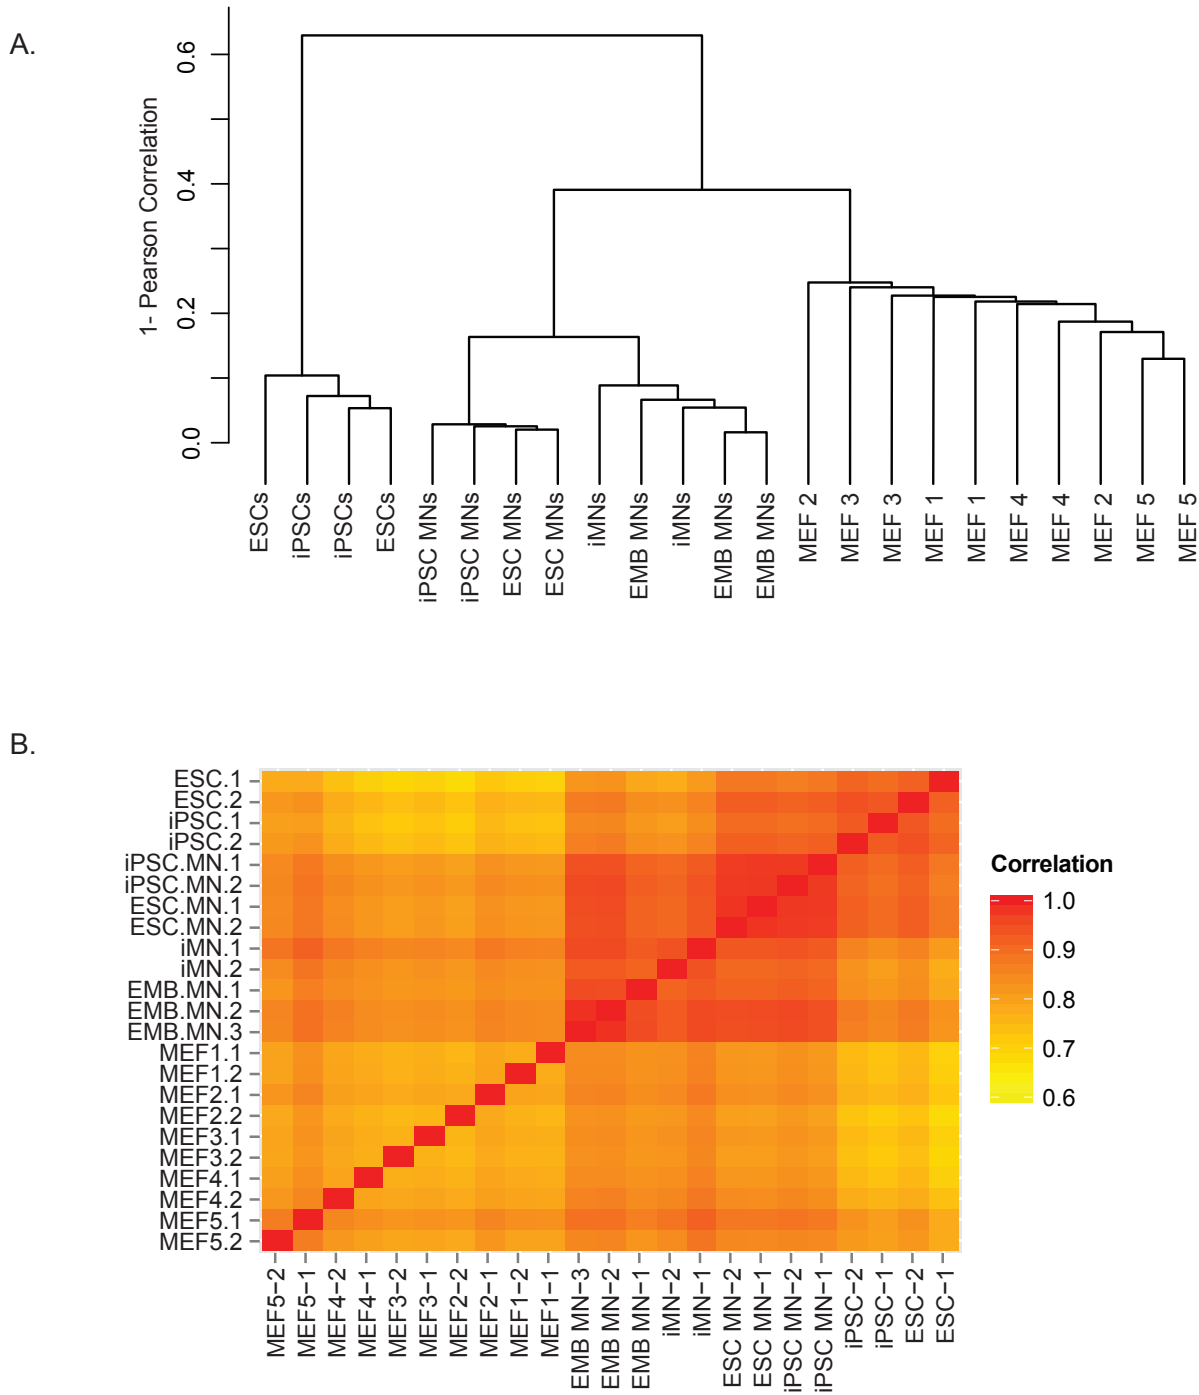

Figure S10. Global overview of methylation analysis. A). Dendrogram of biological replicates, constructed by pairwise complete linkage of all the methylation values at all CpGs. B. Pearson correlation of biological replicates based on methylation of all CpGs. Two biological replicates were analyzed per sample type in A and B (all biological replicates are shown for B).

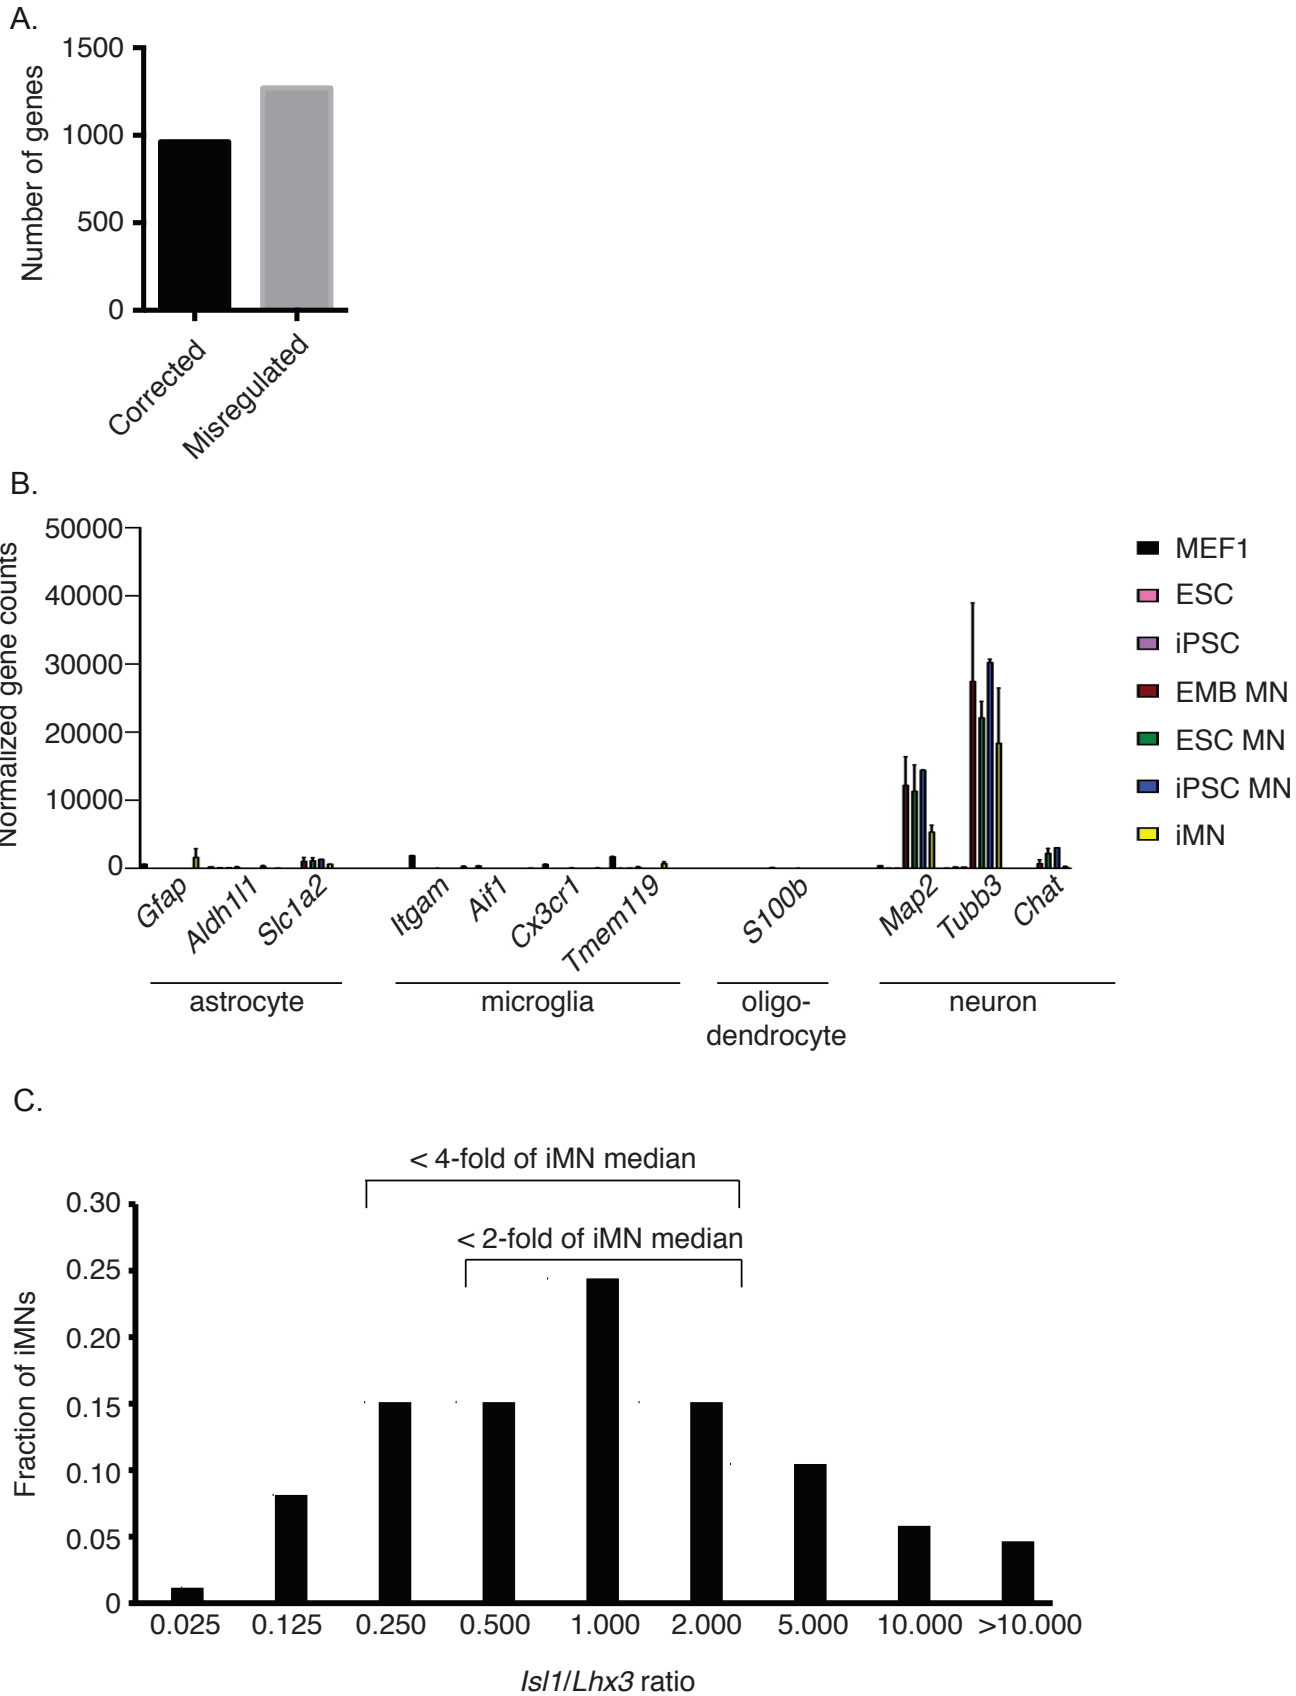

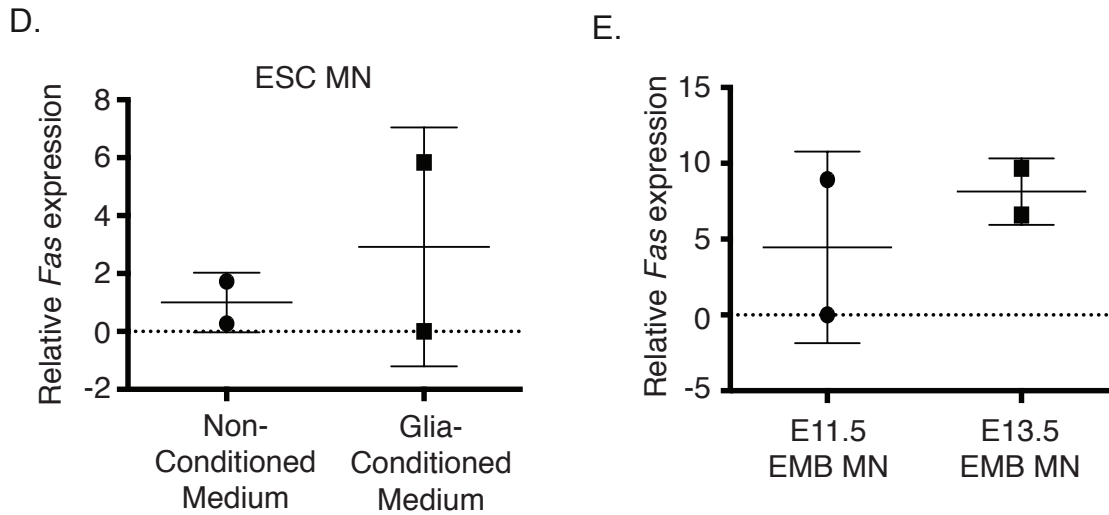

Figure S11. Effects of glial co-culture, reprogramming factor stoichiometry, and maturation on in vitro-derived motor neurons.

A) Number of genes that are correctly expressed in iMNs that change from incorrect to correct, or change from correct to incorrect expression in ESC MNs if they are differentiated in glia-conditioned medium. B) mRNA expression levels of glia-specific genes in different samples as a quantitative measure of glial contamination in iMN samples. Mean  $\pm$  s.d. C) Fraction of iMNs expressing the specified *Isl1/Lhx3* ratios. A total of 62 Hb9+ iMNs were analyzed from two independent lineage conversions. D) Relative mRNA expression of the Fas receptor in ESC MNs differentiated with or without glia-conditioned medium. Mean of two biological replicates  $\pm$  s.d. E) Relative mRNA expression of the Fas receptor in E11.5 or E13.5 EMB MNs. Mean of two biological replicates  $\pm$  s.d. All mRNA levels were determined by RNA-seq analysis. Two biological replicates were analyzed per sample type in all experiments.

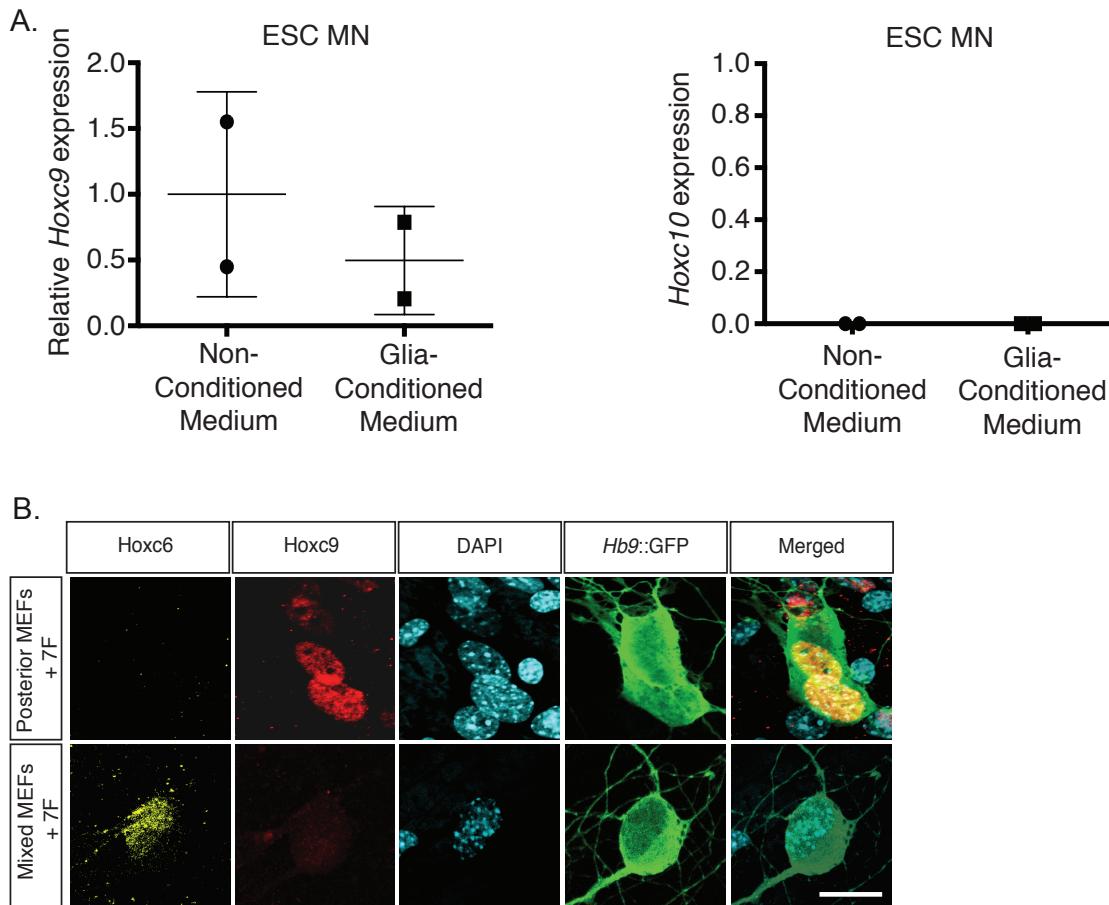

Figure S12. *Hox* gene expression in *in vitro*-derived motor neurons.

A) *Hoxc9* and *Hoxc10* mRNA expression in ESC MNs differentiated in the presence or absence of glia-conditioned medium. Mean  $\pm$  s.d. of two biological replicates. mRNA expression was determined by RNA-Seq analysis. B) Immunocytochemical analysis of *Hox* gene levels in iMNs generated from either posterior MEFs or mixed MEFs. iMN conversions were fixed at day 14 post-transduction and immunostained. Images are representative of three biological replicates. Scale bar - 10  $\mu$ m.

Table S1. Names and descriptions of the samples used to perform RNA-seq and reduced representation bisulfite sequencing analysis. The genetic background, cell type, biological replicate number, and culturing or FACS-sorting information is included for each sample.

[Click here to Download Tables S1](#)

Table S2. DESeq2 normalized gene counts for all samples simultaneously.

[Click here to Download Tables S2](#)



| Study                      | Target Cell Type              | Starting Cell Type                      | Reference Cell Type      | Maturity of Reference Cell             | Conversion Method                     | Species      |
|----------------------------|-------------------------------|-----------------------------------------|--------------------------|----------------------------------------|---------------------------------------|--------------|
| Ieda et al 2010, GSE22292  | 4-week Cardiomyocyte          | (Neonatal) Cardiac Fibroblast           | Cardiomyocyte            | Neonatal                               | Lineage Conversion                    | Mus musculus |
| Huang et al 2010, GSE23635 | Hepatocyte                    | P19Arf-null (Adult) Tail Tip Fibroblast | Hepatocyte               | Adult, cultured <i>in vitro</i> 6 days | Lineage Conversion                    | Mus musculus |
| Zhou et al 2008, GSE12025  | Pdx1-GFP+ Beta Cell           | (Adult) Non-Islet Pancreatic Cell       | Pdx1-GFP+ Beta Cell      | Adult                                  | Lineage Conversion ( <i>in vivo</i> ) | Mus musculus |
| Marro et al 2011, GSE30102 | Tau-GFP+ Neuron               | (Embryonic) Fibroblast                  | Tau-GFP+ Cortical Neuron | Neonatal                               | Lineage Conversion                    | Mus musculus |
| Han et al 2012, GSE30500   | 5-factor Neural Stem Cell     | (Embryonic) Fibroblast                  | Neural Stem Cell         | Embryonic                              | Lineage Conversion                    | Mus musculus |
| Thier et al 2012, GSE36484 | Neural Stem Cell              | (Embryonic) Fibroblast                  | Neural Stem Cell         | Embryonic                              | Lineage Conversion                    | Mus musculus |
| Zhao et al 2009, GSE16925  | Induced Pluripotent Stem Cell | (Embryonic) Fibroblast                  | Embryonic Stem Cell      | Embryonic                              | Lineage Conversion                    | Mus musculus |
| Bock et al 2011, GSE25970  | Induced Pluripotent Stem Cell | (Adult) Fibroblast                      | Embryonic Stem Cell      | Embryonic                              | Lineage Conversion                    | Homo sapiens |

**Table S3.** Identity and maturity level of target, starting, and reference cell types analyzed in Figure 3D. GEO accession numbers for each dataset are included in the first column. Two (neurons, 5-factor neural stem cells), three (cardiomyocytes, beta cells, neural stem cells, mouse iPSCs, human iPSCs), or four (hepatocytes) biological replicates were examined per sample type.
